# Supplementary material for: The cell wall lipoprotein CD1687 acts as a DNA binding protein during deoxycholate-induced biofilm formation in Clostridioides difficile
Source: NPJ Biofilms Microbiomes. 2023 May 11;9:24. doi: 10.1038/s41522-023-00393-5 (PMC10175255; doi:10.1038/s41522-023-00393-5)
Supplement: Supplementary file 6 — Supplementary table 5 [file 41522_2023_393_MOESM6_ESM.xlsx]

## Sheet: Table S5
Suppelmentary Table 5: Proteins isolated by pull-down
					Pull-down data													Regulation in transcriptomes
					Q.value	Score	Intensity total	Intensity in bait					Intensity in control					630Δerm/Δ1687 in BHISG + DCA		630Δerm pDIA6920 / 630Δerm pDIA6103 in BHISG + ATC
Gene ID	Short ID	Name	Uniprot accession	Product				Bait 1	Bait 2	Bait 3	Bait 4	Bait 5	Control 1	Control 2	Control 3	Control 4	Control 5	log2(FC)	p.value	log2(FC)	p.value
Membrane
CD630_07470	CD0747		ID:2831828	Putative lipoprotein	0	5.2905	68078000	0	17259000	20253000	14948000	15618000	0	0	0	0	0	0.415059	0.00102593	0.206594	0.651319
CD630_26670	CD2667	ptsG-BC	ID:2834080	PTS system, glucose-specific IIBC component	0	6.8262	104870000	0	0	44115000	0	60760000	0	0	0	0	0	-0.0136474	0.960382	1.71703	1.83e-10
CD630_26930	CD2693		ID:2834096	Sodium:dicarboxylate symporter family protein	0	5.3232	19457000	0	9015900	0	10441000	0	0	0	0	0	0	-0.295936	0.0612769	-0.506972	0.0663955
CD630_27660	CD2766		ID:2832983	Transcriptional regulator, LytR family	0	11.402	192130000	0	0	45282000	92962000	53886000	0	0	0	0	0	-0.176894	0.204664	1.04471	0.00653091
Secreted/Cell Wall
CD630_06890	CD0689		ID:2831775	Putative nucleotide phosphodiesterase	0.0093787	1.436	25817000	0	0	0	19058000	6758900	0	0	0	0	0	0.233233	0.133585	0.665243	0.0521934
CD630_08690	CD0869	modA	ID:2831929	ABC-type transport system, molybdenum-specific extracellular solute-binding protein	0	3.4863	74382000	0	17744000	14440000	25392000	16807000	0	0	0	0	0	0.922222	1.3e-11	-0.449107	0.162425
CD630_16870	CD1687		ID:2832610	Putative lipoprotein	0	323.31	106350000000	7537000000	29629000000	20193000000	35735000000	13255000000	0	0	0	0	0	4.50788	0.0048508	5.37003	1.05e-100
CD630_19790	CD1979		ID:2833522	ABC-type transport system, extracellular solute-binding protein	0.0093349	1.3845	28041000	0	16297000	0	0	11744000	0	0	0	0	0	-0.0123835	0.943745	0.440091	0.160256
CD630_21770	CD2177		ID:2833683	ABC-type transport system, cystine/aminoacid-family extracellular solute-binding protein	0	9.9983	68362000	0	9347700	7000600	33534000	18480000	0	0	0	0	0	0.527297	0.00223446	-0.673939	0.0182724
CD630_28780	CD2878	fhuD	ID:2834251	ABC-type transport system, ferrichrome-specific extracellular solute-binding protein	0.0013351	2.8652	35036000	0	0	8292500	20364000	6380100	0	0	0	0	0	-1.67981	0.484371	-0.00687584	0.994508
Flagella
CD630_02280	CD0228	fliN	ID:2831419	Flagellar motor switch protein FliN	0.0037688	1.9719	43241000	0	21270000	21971000	0	0	0	0	0	0	0	-0.327109	0.102743	0.471934	0.571408
Cytoplasm
CD630_00370	CD0037	acoB	ID:2831194	Acetoin dehydrogenase E1 component (TPP-dependent beta subunit)	0.0013021	2.4252	16561000	0	9253000	0	7307600	0	0	0	0	0	0	2.16936	1.26e-27	1.81225	0.000371413
CD630_01930	CD0193	groS	ID:2831392	10 kDa chaperonin (Protein Cpn10) (GroES protein)	0	6.3914	61374000	0	57283000	0	0	4090400	0	0	0	0	0	-1.35999	0.00234444	0.740947	0.0185465
CD630_06860	CD0686	rpmI	ID:2831772	50S ribosomal protein L35	0	6.2209	436320000	268520000	0	0	20313000	14292000	133190000	0	0	0	0	0.121284	0.708797	-0.0197627	0.963619
CD630_06990	CD0699	pheS	ID:2831782	Phenylalanyl-tRNA synthetase alpha chain (Phenylalanine--tRNA ligase alpha chain) (PheRS)	0	3.6966	19279000	0	7955900	4378900	0	6944500	0	0	0	0	0	0.58511	0.00336253	2.16561	9.94e-09
CD630_10530	CD1053		ID:2832106	Putative aminoacyl-tRNA synthetase-associated domain	0.0025707	2.2874	30436000	3570200	18715000	8150400	0	0	0	0	0	0	0	0.140577	0.348955	0.954798	0.0191074
CD630_12010	CD1201	nusB	ID:2832230	N utilization substance protein B homolog (Protein NusB)	0.0049261	1.8075	32594000	15473000	0	0	4493700	3042800	9584400	0	0	0	0	0.228378	0.150511	-1.23785	0.00289673
CD630_14090	CD1409		ID:2832398	Putative competence-damage inducible protein, CinA family	0	10.507	198430000	0	10577000	135870000	9386400	42597000	0	0	0	0	0	-0.0900016	0.537995	1.3656	0.000409683
CD630_24400	CD2440		ID:2833886	Putative metal-dependent hydrolase	0	4.9775	80177000	0	34072000	22596000	23509000	0	0	0	0	0	0	-0.112052	0.534934	0.667089	0.211035
CD630_24480	CD2448		ID:2833894	Putative MiaB-like tRNA modifying enzyme	0.0013717	3.283	40681000	16966000	11116000	5737500	0	0	6861000	0	0	0	0	0.307386	0.0759871	0.0777852	0.892282
CD630_24910	CD2491	pmi	ID:2832930	Mannose-6-phosphate isomerase (Phosphomannose isomerase) (PMI) (Phosphohexomutase)	0	21.629	132100000	44194000	49782000	8205800	16367000	3518300	10035000	0	0	0	0	0.0229359	0.929738	0.246226	0.569041
CD630_25150	CD2515		ID:2832935	Putative L-aspartate-beta-decarboxylase	0	8.9368	12565000	0	0	4563500	4776700	3225000	0	0	0	0	0	0.171988	0.403691	0.199173	0.651237
CD630_26680	CD2668		ID:2834081	Transcription antiterminator, licT family	0.001292	2.3441	71559000	0	28488000	14390000	28681000	0	0	0	0	0	0	-0.160992	0.613819	0.420821	0.323321
CD630_26950	CD2695	asnA	ID:2834098	Aspartate--ammonia ligase (Asparagine synthetase A)	0	10.274	121340000	16254000	48395000	8807100	32177000	15707000	0	0	0	0	0	0.756256	1.39e-07	1.13281	0.00408937
CD630_28190	CD2819		ID:2832990	Putative amino acid racemase	0.0072202	1.6573	17778000	0	10123000	0	7655600	0	0	0	0	0	0	1.04248	1.88e-09	0.455763	0.23812
CD630_28530	CD2863	dltA	ID:2834232	D-alanine--poly(phosphoribitol) ligase subunit 1	0	3.5225	59107000	0	0	26101000	33006000	0	0	0	0	0	0	-0.441715	0.0477625	0.676864	0.467854
CD630_30290	CD3029	malY	ID:2834393	Bifunctional protein: cystathionine beta-lyase / repressor	0.0049505	1.8298	54554000	0	18893000	21063000	14599000	0	0	0	0	0	0	-0.338226	0.116981	1.43349	1.24e-05
CD630_31330	CD3133		ID:2834483	Transcription antiterminator, PTS operon regulator	0.0060827	1.6962	64288000	0	40498000	13719000	0	10071000	0	0	0	0	0	-0.363976	0.0893744	-0.197921	0.964948
CD630_31360	CD3136	bglA	ID:2834486	6-phospho-beta-glucosidase	0	26.267	385550000	63311000	81918000	135670000	57789000	4360500	42502000	0	0	0	0	-1.30385	9.43e-08	3.28207	1.26e-19
CD630_31380	CD3138	bglG	ID:2834488	Transcription antiterminator, PTS operon regulator	0	6.0505	46728000	0	14458000	21162000	11109000	0	0	0	0	0	0	-1.38089	1.04e-08	1.88824	1.73e-06
CD630_32230	CD3223	dapA2	ID:2833055	Dihydrodipicolinate synthase 2	0	4.5273	30819000	0	0	11937000	18882000	0	0	0	0	0	0	-0.195936	0.422845	0.709567	0.0355891
CD630_32810	CD3281	proC	ID:2834594	Pyrroline-5-carboxylate reductase	0	6.5116	76953000	13786000	10395000	4788900	13059000	6685400	0	0	0	28239000	0	0.559683	0.0027104	1.11887	0.00158153
CD630_34350	CD3435	cobQ	ID:2834734	Cobyric acid synthase CobQ	0	5.5272	22584000	0	11465000	0	11119000	0	0	0	0	0	0	0.0910768	0.652014	0.88297	0.00514093
CD630_34630	CD3463	alr2	ID:2834757	Alanine racemase 2	0	9.5998	47934000	20230000	14783000	9247500	0	0	3674000	0	0	0	0	0.978335	1.57e-20	0.613204	0.00539466
Unknown
CD630_04380	CD0438		ID:2831578	Conserved hypothetical protein	0	40.911	232160000	29148000	43834000	27290000	43020000	16907000	71964000	0	0	0	0	0.124997	0.674711	-0.361081	0.653136
CD630_07950	CD0795		ID:2831869	Conserved hypothetical protein, UPF0082 family	0	8.7252	216310000	121160000	6008500	0	23733000	13359000	52043000	0	0	0	0	-0.0262338	0.897068	0.764301	0.00225931
CD630_08980	CD0898		ID:2831951	Conserved hypothetical protein, DUF1846-family	0	11.964	30076000	4058200	19146000	6871300	0	0	0	0	0	0	0	-0.267789	0.126088	0.0898681	0.819372
CD630_10030	CD1003	fumA	ID:2832057	Fumarate hydratase class I, subunit A	0.00492	1.8007	19415000	0	0	12150000	7265500	0	0	0	0	0	0	0.789619	2.98e-10	1.00299	0.0144532
CD630_11640	CD1164	obgE	ID:2832195	Spo0B-associated GTP-binding protein	0.0013624	3.1836	26205000	0	17001000	0	9204400	0	0	0	0	0	0	-0.248986	0.00448823	-2.29757	2.57e-19
CD630_12200	CD1220	nudF	ID:2832247	Putative hydrolase, NUDIX family	0	4.6863	40700000	0	0	5725500	7446000	27529000	0	0	0	0	0	-0.372002	0.00789133	0.270972	0.648985
CD630_12320	CD1232		ID:2833325	Putative lipoprotein	0	4.6961	27563000	0	0	7923500	16139000	3501000	0	0	0	0	0	0.746795	8.86e-08	1.33373	0.00206046
CD630_22090	CD2209		ID:2833711	Putative GTP-binding protein, HflX type	0	10.763	249110000	25720000	96961000	0	126430000	0	0	0	0	0	0	-0.107462	0.576813	-0.519558	0.263375
CD630_34300	CD3430	cbiC	ID:2834729	Cobalt-precorrin-8X methylmutase (Cobalt-precorrin isomerase) (HBA synthase)	0.0037406	1.8832	18887000	0	0	6217300	12670000	0	0	0	0	0	0	0.070508	0.727292	2.02674	9.84e-06
